# Supplementary material
Source: publisher figshare collection journal article supplement (https://diabetesjournals.figshare.com/ndownloader/files/24146672)
Supplement: Supplementary file 1 [file 24146672]

## Sheet: Sheet1
Country Name	Primary Investigator Forename	Primary Investigator Surname	Primary Location Facility Name	Primary Location Town/City
Argentina	Mirta	Diez	Cardiovascular Institute of Buenos Aires, Argentina	Buenos Aires
Argentina	Sonia	Sassone	Consultorios Asociados de Endocrinología	Buenos Aires
Argentina	Diego	Aizenberg	Centro Médico Viamonte	CABA
Argentina	Maria	Talavera	Instituto Cardiovascular de Buenos Aires	CABA
Argentina	Guillermo	Mercau	Centro Modelo de Cardiologia	San Miguel de Tucuman
Argentina	Diego	Martinez	Instituto DAMIC Fundacion Rusculleda	Cordoba
Argentina	Juan	Albisu	Instituto Cardiovascular San Luis	San Luis
Argentina	Alejandro	Hershson	Fundacion Favaloro	Ciudad Autonoma Buenos Aires
Argentina	Rubén	García Durán	Instituto de Investigaciones Clinicas San Nicolas	San Nicolás
Argentina	Miguel	Hominal	Centro de Investigaciones	Santa Fe
Argentina	Natalia	Cluigt	Instituto de Investigaciones Clínicas Mar del Plata	Mar del Plata
Argentina	Fernando	Colombo Berra	Instituto Medico CER	Quilmes
Argentina	Eduardo	Perna	Instituto de Cardiología de Corrientes "J.F.Cabral"	Corrientes
Argentina	Rodolfo	Ahuad Guerrero	Corporacion Medica San Martin	San Martin
Argentina	Daniela	García Brasca	Hospital Italiano de Córdoba	Córdoba
Argentina	Cesar	Zaidman	CIPREC	CABA
Argentina	Claudio	Majul	CEMEDIC	Ciudad Autonoma de Buenos Aire
Argentina	José	Taborda	Centro de Investigaciones Medicas	Mar del Plata
Argentina	Hugo	Luquez	Centro Médico Luquez	Cordoba
Argentina	Jorgelina	Sala	Instituto de Investigaciones	Rosario
Argentina	Alvaro	Sosa Liprandi	Sanatorio Güemes	Buenos Aires
Argentina	Guillermo	Cursack	Sanatorio Esperanza	Esperanza
Argentina	Oscar	Montaña	Clínica Privada DIM	Ramos Mejía
Argentina	Alberto Alfredo	Fernandez	Instituto de Investigaciones Clinicas Quilmes	Quilmes
Argentina	Martín	Najenson	Centro de Atencion e Investigacion Clinica Integral	Rosario
Argentina	Sebastian	Nani	Clínica Olivos	Vicente Lopez
Argentina	Gustavo	Caruso	Hospital Ramos Mejía	Ciudad de Buenos Aires
Argentina	Enrique	Fairman	Clinica Bazterrica	Caba
Argentina	Stella	Pereiro Gonzalez	Complejo Médico-Policial "Churruca-Visca"	CABA
Brazil	Lilia	Maia	Hospital de Base São José do Rio Preto	São José do Rio Preto
Brazil	Adamastor	Pereira	Hosp. Clínicas de Porto Alegre	Porto Alegre
Brazil	Paulo	Rossi	Nucleo de Pesquisa Clinica S/S	Curitiba
Brazil	Dalton	Precoma	Sociedade Hopitalar Angelina Caron	Campina Grande do Sul
Brazil	Fernando	Neuenschwander	Hospital Vera Cruz	Belo Horizonte
Brazil	Gilmar	Reis	Cardioresearch Cardiologia Assistencial e de Pesquisa	Belo Horizonte
Brazil	Fabio	Guimaraes	ICM Instituto do Coração de Marília	Marilia
Brazil	José	Saraiva	Instituto de Pesquisa clinica de Campinas	Campinas
Brazil	Flavia	Arantes	Eurolatino Medical Research	Uberlandia
Brazil	Mauro	Hernandes	Santa Casa de Misericordia of Votuporanga	Votuporanga
Brazil	Joao	Borges	Clínica de Endocrinologia e Metabologia Ltda	Brasilia
Brazil	Bruno	Paolino	CCBR Centro de Pesquisa Clinica	Rio de Janeiro
Brazil	Eduardo	Vasconcellos	CCBR Brasilia	Brasillia
Brazil	Euler	Manenti	Hospital Mãe de Deus	Porto Alegre
Brazil	Pedro	Pimentel	Hospital Nossa Senhora da Conceição	Porto Alegre
Brazil	Paulo	Leaes	Irmandade Santa Casa de Misericórdia de Porto Alegre	Porto Alegre
Brazil	Salvador	Rassi	Hospital das Clínicas da Universidade Federal de Goiás	Goiânia
Brazil	Talia	Dalcoquio	Instituto do Coracao da HC FMUSP	Sao Paulo
Bulgaria	Tsvetana	Katova	MHAT National Cardiology Hospital EAD	Sofia
Bulgaria	Danail	Avramov	National Cardiology Hospital, Clinic of Cardiology	Sofia
Bulgaria	Nataliya	Spasova	UMHAT Tsaritsa Yoanna - ISUL, Clinic of Cardiology	Sofia
Bulgaria	Dimitar	Raev	MHAT Sveta Anna AD	Sofia
Bulgaria	Boryana	Chompalova	MHAT - Plovdiv, Department of Cardiology	Plovdiv
Bulgaria	Maria	Milanova	UMHATEM N. I. Pirogov, Clinic of Cardiology	Sofia
Bulgaria	Maria	Tokmakova	UMHAT 'St. Georgi', Cl. of Cardiology	Plovdiv
Bulgaria	Nikolai	Runev	UMHAT Aleksandrovska EAD, Clinic of prop. in internal diseas	Sofia
Bulgaria	Atanas	Mihov	MHAT “Sveta Ekaterina”, Department of internal diseases	Dimitrovgrad
Bulgaria	Antoni	Gogov	MHAT Haskovo AD	Haskovo
Bulgaria	Adriana	Dincheva	MC Avicena, Cardiology office	Sofia
Bulgaria	Nikolay	Iliev	MHAT Sveti Pantaleymon - Pleven, Department internal dis	Pleven
Bulgaria	Borislav	Kolomanov	MC Medi city 21 OOD	Kyustendil
Bulgaria	Yuliyana	Ivanova	DCC “Focus 5 - LZIP" EOOD, Cardiology office	Sofia
Bulgaria	Katya	Ilieva	MHAT Blagoevgrad	Blagoevgrad
Bulgaria	Dimitar	Karageorgiev	MHAT Sveta Karidad EAD	Plovdiv
Bulgaria	Ivan	Petrov	DCC 1 Lom	Lom
Bulgaria	Nikolay	Botushanov	MHAT Med Line Clinic AD	Plovdiv
Bulgaria	Stefka	Vladeva	UMHAT Kaspela EOOD	Plovdiv
Canada	Christian	Constance	Clinique Sante Cardio MC	Montreal
Canada	Saul	Vizel	Vizel Cardiac Research	Cambridge
Canada	Amritanshu	Pandey	Cambridge Cardiac Care Centre	Cambridge
Canada	Denis-Carl	Phaneuf	CISSS de Lanaudiere - Hopital Pierre Le Gardeur	Terrebonne
Canada	Shamir	Mehta	Hamilton Health Sciences General Site	Hamilton
Canada	Dennis	Rupka	Fraser Clinical Trials Inc	New Westminster
Canada	Yves	Pesant	St-Jerome Medical Research Inc	Saint-Jerome
Canada	Paul	Poirier	L'Institut de cardiologie et de pneumologie de Quebec	Quebec
Canada	Raja	Chehayeb	Viacar Recherche Clinique Inc	Greenfield Park
Canada	Mohan	Babapulle	Mohan Babapulle Medicine Professional Corporation	Waterloo
Canada	Eileen	O’Meara	Institut de Cardiologie de Montréal	Montreal
Canada	Jonathan	Howlett	University of Calgary	Calgary
Canada	Louis	Yao	The Office of Dr. Louis Yao	York
Canada	Robert	McKelvie	London Health Sciences Centre	London
Canada	Subodh	Verma	North York Diagnostic and Cardiac Centre	North York
Canada	Michael	Hartleib	Kawartha Cardiology Clinical Trials	Peterborough
Canada	Ram	Vijayaraghavan	Heart Health Institute	Scarborough
Canada	John	Vyselaar	The Medical Arts Health Research Group	North Vancouver
Canada	Fabian	Azzari	CISSS du Bas-Saint-Laurent/Hôpital Régional de Rimouski	Rimouski
Canada	James	Cha	Dr James Cha	Oshawa
Canada	Farah	Nasser-Sharif	Medical Associates of Port Perry	Port Perry
Canada	Tun Zan	Maung	Office of Dr. Tun Zan Maung	Abbotsford
Canada	Samer	Mansour	Centre Hospitalier de l'Universite de Montreal	Montreal
Canada	Yaariv	Khaykin	Partners of Advanced Cardiac Evaluation (PACE)	Newmarket
Canada	Rina	Lee	Dr Georges-L. Dumont University Hospital Centre	Moncton
Canada	Peter	Fong	Horizon Health Network	Saint John
China	Junbo	Ge	Shanghai Institute of Cardiovascular Diseases, Zhongshan Hospital, Fudan University, Shanghai, China
China	Hong	Jiang	Zhongshan Hospital Fudan University	Shanghai
China	Xinli	Li	Jiangsu Province Hospital	Nanjing
China	Lu	Fu	The First affiliated Hospital of Haerbin Medical University	Haerbin
China	Ying	Li	Shanghai East Hospital	shanghai
China	Dongfang	Wang	Chifeng Hospital	Chifeng
China	Qiang	Zhao	Ruijing hospital Shanghai Jiaotong University of medicine	Shanghai
China	Yugang	Dong	1st Affiliated Hospital of Sun Yat-Sen University	guangzhou
China	Yimeng	Zhou	Yangpu Hospital, Tongji University	Shanghai
China	Xiufang	Lin	The fifth affiliated hospital Sun YAT-SEN university	zhuhai
China	Jianzeng	Dong	Anzhen Hospital, Capital University of Medical Science	Beijing
China	Xiaoli	Zhang	Zhongda Hospital Southeast University	Nanjing
China	Zeqi	Zheng	1st Affiliated Hospital of Nanchang University	Nanchang
China	Wenjun	Huang	The Jiangxi Pingxiang People’s Hospital	Pingxiang
China	Ye	Gu	PuAi Hospital of Wuhan City	Wuhan
China	Jinqiu	Liu	1st hospital of Dalian Medical University	Dalian
China	Xueya	Guo	Lanzhou University Second Hospital	Lanzhou
China	Ling	Wu	General Hospital of Ningxia Medical University	Yinchuan
China	Qizhu	Tang	People's Hospital of Wuhan University	WUHAN
China	Daoquan	Peng	ZhongNan Univ 2nd Xiangya Hosp	Changsha
China	Wei	Dong	Chinese PLA general hospital	beijing
China	Yingzi	Liang	The 2nd Hospital of Tianjin Medical University	Tianjin
China	Daying	Wang	Shanghai Putuo District Center Hospital	Shanghai
China	Chun	Wu	Peking University ShenZhen Hospital	Shenzhen
China	Zhanquan	Li	The people's hospital of Liaoning province	Shenyang
China	Xuefeng	Lin	The First Affiliated Hospital of Baotou Medical College, Inn	Baotou
China	Xuelian	Zhang	Jilin Province people's hospital	changchun
China	Zhirong	Wang	The Affiliated Hospital of Xuzhou Medical College	Xuzhou
China	Bing	Han	Xuzhou Central hospital	xuzhou
Czech Republic	Jan	Belohlavek	Vseobecna fakultni nemocnice	Praha 2
Czech Republic	Josef	Slaby	Oblastni nemocnice Kolin	Kolin
Czech Republic	Jindrich	Spinar	Fakultni nemocnice Brno-Bohunice,1.interni kardiol.klinika	Brno
Czech Republic	Petr	Hajek	Fakultni nemocnice Motol	Praha 5
Czech Republic	Ladislav	Busak	KardioBusak s.r.o.	Louny
Czech Republic	Jiri	Carda	KARDIO s.r.o.	Trebic
Czech Republic	Lenka	Spinarova	Fakultni nemocnice u Sv. Anny Brno	Brno
Czech Republic	Ivan	Malek	Institut klinicke a experimentalni mediciny,kardiologie	Praha 4
Czech Republic	Jiri	Skopek	Fakultni Thomayerova nemocnice s poliklinikou	Praha
Czech Republic	Roman	Kuchar	Innera s.r.o.	Benesov
Czech Republic	Eva	Krcova	Axon Clinical s.r.o.	Praha 5
Czech Republic	Otto	Mayer Jr.	FN Plzen, II. Interna,Centrum preventivni kardiologie	Plzen
Czech Republic	Dusan	Kucera	Pedicor Care s.r.o.	Ostrava-Dubina
Denmark	Morten	Schou	Herlev og Gentofte Hospital	Herlev
Denmark	Lars	Køber	Rigshospitalet	København Ø
Denmark	Kenneth	Egstrup	OUH Svendborg Sygehus	Svendborg
Denmark	Jens Dahlgaard	Hove	Hvidovre Hospital	Hvidovre
Denmark	Gunnar	Gislason	Gentofte Hospital	Hellerup
Denmark	Lars	Videbæk	Odense Universitetshospital, Kardiologisk afdeling B	Odense C
Germany	Michael	Böhm	Universitaetsklinikum des Saarlandes	Homburg
Germany	Ruth	Nischik	Medamed GmbH	Leipzig
Germany	Nicole	Toursarkissian	Praxis Dr. med. Nicole Toursarkissian	Berlin
Germany	Karl-Friedrich	Appel	B.Braun Ambulantes Herzzentrum Kassel MVZ GmbH	Kassel
Germany	Ekkehard	Schmidt	Cardiologicum Hamburg	Hamburg
Germany	Ingo	Weigmann	Universitätsstudienzentrum für Stoffwechselerkrankungen	Dresden
Germany	Monika	Kellerer	Marienhospital Stuttgart	Stuttgart
Germany	Ayham	Al-Zoebi	Praxis Dr. Al-Zoebi	Wermsdorf
Germany	Uta	Stephan	Medizinisches Versorgungszentrum am Bahnhof Spandau	Berlin
Germany	Andreas	Wilke	Kardiologische Gemeinschaftspraxis Papenburg	Papenburg
Germany	Sabine	Genth-Zotz	Katholisches Klinikum St. Vincenz- und Elisabeth- Hospital	Mainz
Germany	Gregor	Simonis	Zentrum für klinische Prüfungen	Dresden
Germany	Diethelm	Tschöpe	Herz- und Diabeteszentrum NRW	Bad Oeynhausen
Germany	Angelika	Costard-Jäckle	Herz- und Diabeteszentrum NRW	Bad Oeynhausen
United Kingdom	Mark	Petrie	New Lister Building	Glasgow
United Kingdom	Roy	Gardner	Golden Jubilee National Hospital	Clydebank
United Kingdom	Andrew	Clark	Castle Hill Hospital	Cottingham
United Kingdom	Alan	Japp	Royal Infirmary of Edinburgh at Little France	Edinburgh
United Kingdom	Pardeep	Jhund	Queen Elizabeth University Hospital	Glasgow
United Kingdom	Chim	Lang	Division of Molecular & Clinical Medicine	Dundee
United Kingdom	Stephen	Leslie	Research, Development and Innovation Dept	Inverness
United Kingdom	Clare	Murphy	Royal Alexandra Hospital	Paisley
United Kingdom	Colin	Petrie	NHS Lanarkshire - Monklands Hospital	Airdrie
United Kingdom	John	Walsh	Nottingham City Hospital	Nottingham
Hungary	Béla	Merkely	Semmelweis Egyetem,Városmajori Szív és Érgyógyászati Klinika	Budapest
Hungary	Péter	Andrássy	Bajcsy-Zsilinszky Kórház és Rendelőintézet	Budapest
Hungary	Ebrahim	Noori	Fejér Megyei Szent György Kórház	Székesfehérvár
Hungary	Zoltán	Járai	Szt. Imre I. Bel.	Budapest
Hungary	Ferenc	Poór	Karolina Kórház-Rendelöintézet	Mosonmagyaróvár
Hungary	Csaba	Király	Bács-Kiskun Megyei Kórház SzTE ÁOK Oktató Kórháza	Kecskemét
Hungary	Anna	Czigány	XIII kerületi Egészségügyi Szolgálat Közhasznú Nonprofit Kft	Budapest
Hungary	László	Nagy	Csongrád Megyei Dr Bugyi István Kórház	Szentes
Hungary	Ákos	Motyovszki	WM-MED Kft	Zalaegerszeg
Hungary	Gabriella	Masszi	Nyírő Gyula Kórház - OPAI	Budapest
India	Vimal	Mehta	G.B. Pant Hospital	New Delhi
India	V	Chopra	Medanta-The Medicity	Gurgaon
India	Ajay	Naik	Care Institute of Medical Sciences	Ahmedabad
India	Milind	Gadkari	K . E. M. Hospital	Pune
India	Rahul	Sawant	Noble Hospital	Maharashtra
India	Mashhadi	Mahapekar	DDMM Heart Institute	Nadiad
India	Sunil	Karna	Bhanubhai & Madhuben Patel Cardiac Centre	Karamsad
India	Mukund	Deshpande	Government Medical College	Nagpur
India	Varun	Bhargava	Ganga Care Hospital	Nagpur
India	Veerappa	Kothiwale	KLES Dr. Prabhakar Kore Hospital & M.R.C	Belagavi
India	Jaideep	Menon	Sree Narayana Institute of Medical Sciences	Ernakulam
India	Dhurjati	Sinha	Institute of Post Graduate Medical Education & Research	Kolkata
India	Santosh	Sinha	Ganesh Shankar Vidyarthi Memorial Medical College	Kanpur
India	Hemant	Kokane	B.J. Govt. Medical College and Sassoon General Hospital	Pune
India	Prashant	Udgire	Mahatma Gandhi Mission Medical College	Aurangabad
India	Manjinder	Sandhu	Artemis Hospitals	Gurgaon
Japan	Masahiro	Suzuki	National Hospital Organization Saitama National Hospital	Wako-shi
Japan	Masami	Nishino	Osaka Rosai Hospital	Sakai-shi,Kita-ku
Japan	Arihiro	Kiyosue	Tokyo Eki Center-Building Clinic	Chuo-ku
Japan	Kotaro	Sumii	Mazda Hospital of Mazda Motor Corporation	Aki-gun,
Japan	Shu	Suzuki	KKR Tohoku Kosai Hospital	Sendai-shi
Japan	Yuichi	Noguchi	Tsukuba Medical Center	Tsukuba-shi
Japan	Shinji	Tanaka	Shonan Fujisawa Tokushukai Hospital	Fujisawa-shi
Japan	Horoyuki	Takase	JA Shizuoka Koseiren Enshu Hospital	Hamamatsu-shi
Japan	Masahiro	Mohri	JCHO Kyushu Hospital	Kitakyusyu-shi
Japan	Shinichi	Higashiue	Kishiwada Tokushukai Hospital	Kishiwada-shi
Japan	Noritaka	Fujimoto	National Hospital Organization Beppu Medical Center	Beppu-shi
Japan	Harukazu	Iseki	Agricultural Cooperatives, Sagamihara Kyodo Hospital	Sagamihara-shi
Japan	Takehiko	Kuramochi	Kioroshikaii Chibanishi General Hospital	Matsudo-shi
Japan	Taro	Shibasaki	Social Medical Corporation Sayama General Clinic	Sayama-shi
Japan	Hiroshi	Tsutsui	Japanese Red Cross Suwa Hospital	Suwa-shi
Japan	Yuichiro	Takagi	Federation of National Public Service Takamatsu Hospital	Takamatsu-shi
Japan	Satoru	Sakuragi	National Hospital Organization Iwakuni Clinical Center	Iwakuni-shi
Japan	Noriyuki	Takeyasu	Ibaraki Prefectural Central Hospital	Kasama-shi
Japan	Masahumi	Kitakaze	Department of Clinical Research and Development, National Cerebral and Cardiovascular Center, Suita, Japan
Japan	Chisato	Izumi	National Cerebral and Cardiovascular Center Hospital	Suita-shi
Japan	Takafumi	Oga	Shinjuku Research Park Clinic	Shinjuku-ku
Japan	Akira	Kimura	Meijo Hospital	Nagoya-shi
Japan	Tsunekazu	Kakuta	Tsuchiura Kyodo General Hospital	Tsuchiura-shi
Japan	Tetsuo	Hashimoto	Takeda General Hospital	Kyoto-shi
Japan	Hiroshi	Sugino	NHO Kure Medical Center and Chugoku Cancer Center	Kure-shi
Japan	Katsumi	Saito	Nishiarai Heart Center Hospital	Adachi-ku
Japan	Shitoshi	Hiroi	National Hospital Organization Takasaki General MC	Takasaki-shi
Japan	Haruo	kamiya	Japanese Red Cross Nagoya Daiichi Hospital	Nagoya-shi
Japan	Kazuki	Fukui	Kanagawa Cardiovascular and Respiratory Center	Yokohama-shi
Japan	Satoshi	Matsuoka	Seikeikai New Tokyo Heart Clinic	Matsudo-shi
Japan	Kazunori	Moritani	KKR Tachikawa Hospital	Tachikawa-shi
Japan	Yoshiaki	Tomobuchi	Seiyu Memorial Hospital	Wakayama-shi
Japan	Yoshiki	Hata	Minamino Cardiovascular Hospital	Hachioji-shi
Japan	Ryo	Kawamura	Hitachi, Ltd. Hitachinaka General Hospital	Hitachinaka-shi
Japan	Eijiro	Hattori	JA Toride Medical Center	Toride-shi
Japan	Kazuteru	Fujimoto	National Hospital Organization Kumamoto Medical Center	Kumamoto-shi
Japan	Natsuki	Takahashi	Matsuyama Shimin Hospital	Matsuyama-shi
Japan	Wataru	Takahashi	National Hospital Organization Shinshu Ueda Medical Center	Ueda-shi
Japan	Toshiaki	Kadokami	Saiseikai Futsukaichi Hospital	Chikushino-shi
Japan	Hideki	Ueno	Medical corporation Okinawatokushukai, HAYAMA HEART CENTER	Miura-gun
Japan	Shinichiro	Uchikawa	Japanese Red Cross Society Azumino Hospital	Azumino-shi
Japan	Tsuyoshi	Shinozaki	National Hospiral Organization Sendai Medical Center	Sendai-shi
Japan	Yuko	Onishi	Hiratsuka Kyosai Hospital	Hiratsuka-shi
Japan	Nobuyuki	Komiyama	St. Luke's International Hospital	Chuo-ku
Japan	Shujiro	Inoue	Iizuka Hospital	Iizuka-shi
Japan	Yukihiko	Momiyama	National Hospital Organization Tokyo Medical Center	Meguro-ku
Japan	Yasunori	Ueda	National Hospital Organization Osaka National Hospital	Osaka-shi
Japan	Yasuo	Komura	Taijukai Foundation Kaisei General Hospital	Sakaide-shi
Japan	Ryo	Hayashida	Daido Clinic	Nagoya-shi
Japan	Seigo	Masuda	Japanese Red Cross Fukuoka Hospital	Fukuoka-shi
Japan	Motoaki	Higuchi	Mito Saiseikai General Hospital	Mito-shi
Japan	Yasushi	Hayashi	Wakayama Rousai hospital	Wakayama-shi
Japan	Kozaburo	Seki	Yamaguchi Rosai Hospital	Sanyoonoda-shi
Japan	Kenshi	Fujii	Sakurabashi Watanabe Hospital	Osaka-shi
Japan	Ken	Harada	Chubu Rosai Hospital	Nagoya-shi
Japan	Atsuyuki	Wada	Kusatsu general hospital	Kusatsu-shi
Japan	Takatoshi	Kasai	Juntendo University Hospital	Bunkyo-ku
Japan	Koichiro	Kuwahara	Shinshu University Hospital	Matsumoto-shi
Japan	Shogo	Oishi	Hyogo Brain and Heart Center	Himeji-shi
Japan	Issei	Uchida	Tokai Central Hospital of the Mutual Aid Association	Kakamigahara-shi
Japan	Yasuo	Okumura	Nihon University Itabashi Hospital	Itabashi-ku
Japan	Yuji	Hisamatsu	JCHO Shimonoseki Medical Center	Shimonoseki-shi
Japan	Tatsuya	Nunohiro	Nagasaki Harbor Medical Center	Nagasaki-shi
Japan	Kengo	Tsukahara	Fujisawa City Hospital	Fujisawa-shi
Japan	Atsushi	Hirohata	The Sakakibara Heart Institute of Okayama	Okayama-shi
Japan	Masanori	Asakura	Hyogo College of Medicine Hospital	Nishinomiya-shi
Netherlands	Rudolf	de Boer	Universitair Medisch Centrum Groningen	Groningen
Netherlands	Louise	Bellersen	Universitair Medisch Centrum St. Radboud	NIJMEGEN
Netherlands	Henk	Swart	D&A Research & Genetics	Sneek
Netherlands	Björn	Groenemeijer	Gelre Ziekenhuis Apeldoorn	APELDOORN
Netherlands	Stieneke	Zoet Nugteren	Ikazia Ziekenhuis	ROTTERDAM
Netherlands	Cornelis (Ron)	de Nooijer	Maxima Medisch Centrum	VELDHOVEN
Netherlands	Pieter	Nierop	Sint Franciscus Gasthuis	ROTTERDAM
Netherlands	Ramon	Robles de Medina	HAGAZiekenhuis locatie Els Borst-Eilersplein	Den Haag
Netherlands	Jacob (Martijn)	van Eck	Jeroen Bosch Ziekenhuis	Den Bosch
Netherlands	Maarten	van Hessen	Groene Hart Ziekenhuis, locatie Bleuland	GOUDA
Poland	Jarosław	Drożdż	SPZOZ Uniwersytecki Szpital Kliniczny	Łódź
Poland	Paweł	Miękus	NZOZ „PRO CORDIS” Sopockie Centrum Badań Kardiologicznych	Gdynia
Poland	Ryszard	Ściborski	Zespół Opieki Zdrowotnej w Oławie SP ZOZ	Oława
Poland	Beata	Mikłaszewicz	CARDIAMED Beata Miklaszewicz i Dariusz Dabrowski S.J.	Legnica
Poland	Wanda	Sudnik	Centrum Medyczne Dr Sudnik s.c Wanda i Jerzy Sudnik	Sokółka
Poland	Rafał	Mariankowski	Centrum Usług Medycznych MaxMed Marek Maciaszek	Bochnia
Poland	Robert	Witek	Poradnia Chorób Metabolicznych w Wierzchoslawicach	Wierzchosławice
Poland	Grzegorz	Drelich	CenterMed Lublin Sp. z o. o.	Lublin
Poland	Ewa	Mirek-Bryniarska	Ewa Mirek-Bryniarska Specjalistycza Praktyka Lekarska	Kraków
Poland	Sławomir	Szynal	Sławomir Szynal Indywidualna Praktyka Lekarska	Jasło
Poland	Lidia	Pawłowicz	Praktyka Lekarska Lidia Pawlowicz	Torun
Poland	Jacek	Lampart	Centrum Medyczne Pratia Katowice	Katowice
Poland	Romuald	Korzeniak	MEDIKARD Specjalistyczna Przychodnia Lekarska	Płock
Poland	Janusz	Prokopczuk	Polsko-Amerykańskie Kliniki Serca	Kędzierzyn Koźle
Russian Federation	Svetlana	Boldueva	St.Petersburg Mechnikov State Medical Academy	Saint-Petersburg
Russian Federation	Yury	Didenko	St.Petersburg City Multiservice Hospital #2	Saint-Petersburg
Russian Federation	Nino	Dzhaiani	Moscow, City Hospital # 68	Moscow
Russian Federation	Lyudmila	Ermoshkina	Gatchina Central Disctrict Clinical Hospital	Gatchina
Russian Federation	Victor	Kostenko	St. Pt. State Institution of Health "City polyclinic № 109"	Saint-Petersburg
Russian Federation	Elena	Vishneva	City Clinical Hospital 14	Ekaterinburg
Russian Federation	Natalia	Koziolova	Perm Regional Hospital for war veterans	Perm
Russian Federation	Sergey	Tereschenko	Russian Cardiology Research and Manufacturing Complex	Moscow
Russian Federation	Dmitrii	Pevzner	Russian Cardiology Research and Manufacturing Complex	Moscow
Russian Federation	Liudmila	Krylova	Leningrad Regional Clinical Hospital	Saint-Petersburg
Russian Federation	Alexander	Chernyavsky	Meshalkin Research Institute of Blood Circulation Pathology	Novosibirsk
Russian Federation	Andrei	Kazakov	Tver Regional Hospital	Tver
Russian Federation	Sergei	Aksentiev	Ryazan Regional Hospital	Ryazan
Russian Federation	Rostislav	Nilk	City Hospital #38 n.a. N.A.Semashko	Saint Petersburg
Russian Federation	Zhanna	Paltsman	Medical Research Institute	St. Petersburg
Russian Federation	Albert	Galyavich	Kazan State Medical University	Kazan
Russian Federation	Alexey	Maltcev	Consultative and Diagnostic Center 85	Saint Petersburg
Russian Federation	Philipp	Kopylov	First MSMU n.a. I.M.Sechenov based on University clin hosp 1	Moscow
Russian Federation	Andrey	Ezhov	Izhevsk City Clinical Hospital № 9	Izhevsk
Russian Federation	Julia	Shilko	Sverdlovsk Regional Clinical Hospital #1	Yekaterinburg
Slovakia	Lubomir	Antalik	Nemocnica s poliklinikou Brezno, n.o.	Brezno
Slovakia	Viliam	Bugan	MEDIVASA, s.r.o, Nemocnica s poliklinikou	Zilina
Slovakia	Peter	Fulop	Interna SK, s.r.o.	Svidnik
Slovakia	Livia	Jamriskova	KVC-KARDIOVASKULARNE CENTRUM, s.r.o.	Martin
Slovakia	Daniela	Kollarova	Ambulancia pre diabetologiu,DK ORTOPEDIA, s.r.o.	Nove Zamky
Slovakia	Vladimir	Macek	Kardiologicka ambulancia	Trnava
Slovakia	Maria	Slovenska	Interna a diabetologicka ambulancia	Kosice
Slovakia	Livia	Tomasova	Interna a diabelogicka ambulancia IN-DIA s.r.o.	Lucenec
Slovakia	Daniela	Vinanska	Interna ambulancia, Medispol sro	Presov
Slovakia	Rudolf	Smik	MEDIKARD sro	Presov
Slovakia	Juraj	Selecky	Kardiologicka ambulancia, Sciens s.r.o.	Trebisov
Slovakia	Ivan	Majercak	Medical group Kosice s.r.o	Kosice
Slovakia	Peter	Olexa	Kardiologicka a interna ambulancia	Kosice
Sweden	Charlotta	Ljungman	Sahlgrenska Universitetssjukhuset	Göteborg
Sweden	Anders	Hedman	Södersjukhuset AB, Kardiologkliniken	Stockholm
Sweden	Carl-Johan	Lindholm	Hjartmottagningen, Capio Citykliniken	Lund
Sweden	Krister	Lindmark	Norrlands Universitetssjukhus NUS	Umeå
Sweden	Thomas	Mooe	Ostersunds Hospital	Ostersund
Taiwan	Chern	Chiang	Department of Cardiology, Taipei Veterans General Hospital	Taipei
Taiwan	Lian-Yu	Lin	National Taiwan Unversity Hospital, Department of Cardiology	Taipei
Taiwan	Ming-En	Liu	MacKay Memorial Hospital-HC	Hsinchu
Taiwan	Kuan-Cheng	Chang	China Medical University Hospital- Cardiovascular Department	Taichung
Taiwan	Chien-Hsun	Hsia	Changhua Christian Hospital	Changhua City
Taiwan	Jhih-Yuan	Shih	Chi Mei Medical Center	Tainan County
Taiwan	Ping-Yen	Liu	National Cheng Kung University Hosptial	Tainan
Taiwan	Tsung-Hsien	Lin	Kaohsiung Medical University Hospital	Kaohsiung
Taiwan	Hung-Yu	Chang	Cheng Hsin General Hospital	Taipei
Taiwan	Jin-Long	Huang	Taichung Veterans General Hospital	Taichung
Taiwan	I-Chang	Hsieh	Dep of Cardiology, Chang Gung Memorial Hospital - Linkou	Kweishan Shiang
Taiwan	Chih-Cheng	Wu	National Taiwan University Hospital - Hsinchu branch	Hsinchu
Taiwan	Wei-Kung	Tseng	Department of Internal Medicine, E-Da University Hospital	Kaohsiung
United States of America	Ahmed	Arif	AA MRC LLC	Flint
United States of America	David	Avino	Empirican PRN	Orchard Park
United States of America	Supratim	Banerjee	Comprehensive Cardiovascular Medical Group	Bakersfield
United States of America	Manreet	Kanwar	Allegheny General Hospital	Pittsburgh
United States of America	Martin	Berk	Cardiovascular Research Inst of Dallas	Dallas
United States of America	Christopher	Brown	Mobile Heart Specialists PC	Mobile
United States of America	Carlos	Ince Jr.	Maryland Cardiovascular Specialists	Baltimore
United States of America	Todd	Lewis	East Coast Institute for Research, LLC	St. Augustine
United States of America	Akbar	Nikfarjam	Sanitas Research	Miami
United States of America	Jignesh	Patel	California Heart Center	Beverly Hills
United States of America	Kodangudi	Ramanathan	VAMC Memphis	Memphis
United States of America	Alexander	Schabauer	Black Hills Cardiovascular Research	Rapid City
United States of America	Trevor	Greene	East Coast Institute for Research	Jacksonville
United States of America	Keyur	Shah	Virginia Commonwealth University (VCU) Medical Center	Richmond
United States of America	Rodolfo	Sotolongo	Southeast Texas Clinical Research Center	Beaumont
United States of America	Amado	Viera	Nova Clinical Research Center LLC	Miami
United States of America	Olakunle	Akinboboye	Laurelton Heart Specialists PC	Rosedale
United States of America	Amy	Arouni	VA Medical Center - NE	Omaha
United States of America	Barry	Bertolet	Cardiology Associates of North Mississippi	Tupelo
United States of America	Lokesh	Chandra	Chicago Medical Research, LLC	Hazel Crest
United States of America	Thomas	Cimato	Buffalo General Hospital	Buffalo
United States of America	Samuel	DeLeon	Urban Health Plan Inc	Bronx
United States of America	Mosi	Bennett	Allina Health System, dba Abbott Northwestern Hospital	Minneapolis
United States of America	Francesco	Franchi	University of Florida	Jacksonville
United States of America	Glenn	Hamroff	NYPMG Hudson Valley Cardiology	Cortlandt Manor
United States of America	David	Hotchkiss	Peace River Cardiovascular Center	Port Charlotte
United States of America	Michael	Jardula	Desert Oasis Healthcare (Desert Medical Group Inc)	Palm Springs
United States of America	Julian	Javier	Advanced Research for Health Improvement, LLC	Naples
United States of America	Navid	Kazemi	Palm Research Center, Inc	Las Vegas
United States of America	John	Kostis	Rutgers University	New Brunswick
United States of America	Joseph	Lash	Norton Cardiovascular Associates	Louisville
United States of America	Lawrence	Levinson	Tipton Medical Center	Altoona
United States of America	Ira	Lieber	Texas Cardiology Research Center, PLLC	Kingwood
United States of America	Eric	Lo	Central Florida Medical Research, LLC	New Smyrna Beach
United States of America	Sharan	Mahal	Advanced Heart Care, LLC	Bridgewater
United States of America	Ramin	Manshadi	Manshadi Heart Institute Inc	Stockton
United States of America	Freny	Mody	VA Greater Los Angeles Healthcare System/West LA VA Medical	Los Angeles
United States of America	Alexander	Paraschos	Kernodle Clinic Department of the Private Diagnostic Clinic	Burlington
United States of America	Michael	Pursley	Heart Group of the Eastern Shore PC	Fairhope
United States of America	Gavin	Hickey	VA Pittsburgh Healthcare System	Pittsburgh
United States of America	Juan	Londono	Broward Research Group	Pembroke Pines
United States of America	Dinesh	Singal	Cardio Metabolic Institute	Somerset
United States of America	Sunny	Srivastava	Pentucket Medical-Haverhill	Haverhill
United States of America	Julie	Teel	Brooke Army Medical Center	Fort Sam Houston
United States of America	Jorge	Castriz	Great Falls Clinic, LLP	Great Falls
United States of America	Louis	Kantaros	Hudson Valley Cardiovascular Practice PC	Poughkeepsie
United States of America	Chandra	Venugopal	Cardiology Partners Clinical Research Institute	Wellington
United States of America	Cezar	Staniloae	NYU Langone Medical Associates	New York
United States of America	Dinesh	Gupta	Tennessee Center for Clinical Trials	Tullahoma
United States of America	Faizullah	Syed	SYED RESEARCH CONSULTANTS LLC - MULTI SPECIALITIES	Sheffield
United States of America	Michael	Zacharias	University Hospitals Cleveland Medical Center	Cleveland
United States of America	Naseem	Jaffrani	Alexandria Cardiology Clinic	Alexandria
United States of America	Paul	Wakefield	PMG Research of Knoxville	Knoxville
United States of America	Mike	Nassif	Saint Luke's Mid America Heart Institute	Kansas City
United States of America	Tariq	Haddad	Virginia Heart	Falls Church
United States of America	Sherif	Iskander	Cardiovascular Associates of East TX Research	Tyler
United States of America	Gregory	Lewis	Massachusetts General Hospital	Boston
United States of America	Bassam	Al-Joundi	Gateway Cardiovascular Research Center, Inc	St. Louis
United States of America	William	French	UCLA Medical Center	Torrance
United States of America	Modele	Ogunniyi	Emory Univ	Atlanta
United States of America	Sitaramesh	Emani	Ohio State University	Columbus
United States of America	Sara	Weiss	Virginia Mason Medical Center	Seattle
United States of America	Richard	Cheng	University of Washington School of Medicine	Seattle
United States of America	Viorel	Florea	Minneapolis VA Medical Center	Minneapolis
United States of America	Susan	Joseph	Baylor University Medical Center	Dallas
United States of America	Deepak	Gupta	Vanderbilt University Medical Center	Nashville
United States of America	Samuel	Lederman	Altus Research	Lake Worth
United States of America	Joseph	Izzo	Erie County Medical Center	Buffalo
United States of America	Marc	Bernstein	Louisiana Heart Center	Chalmette
United States of America	Erich	Fruehling	Nebraska Specialty Network, LLC, dba Nebraska Heart Institut	Grand Island
United States of America	Brian	Foley	Advanced Cardiovascular LLC	Alexander City
United States of America	Liwa	Younis	Gateway Cardiovascular Research Center, Inc	Jerseyville
United States of America	David	Song	Atlanta Heart Specialists LLC	Tucker
Vietnam	Vinh	Pham	Tam Duc hospital	Ho Chi Minh
Vietnam	Hai	Nguyen	Cardiology dept - Gia Dinh People Hospital	Ho Chi Minh
Vietnam	Huan	Do	HCMC Heart Institute	HCMC
Vietnam	Binh	Truong	UMC	Ho Chi Minh
Vietnam	Hien	Nguyen	Saint Paul Hospital - Out Patient Clinic	Hanoi
Vietnam	Tuan	Nguyen	Hanoi Heart Hospital- Trần Hưng Đạo	Hanoi
Vietnam	Hien	Nguyen	Hanoi Heart Hospital- Lạc Long Quân	Hanoi
Vietnam	Dung	Ho	Thong Nhat Hospital, Cardiology Toracic dept.	Ho Chi Minh
